# Supplementary material for: Scrutinizing Domains of Executive Function in Binge Eating Disorder: A Systematic Review and Meta-Analysis
Source: PubMed Central journal article supplement (PMC7181673; doi:10.3389/fpsyt.2020.00288), 2020-04-17
Supplement: DataSheet_1.pdf [file DataSheet_1.pdf]

## *Supplementary Material*

### **Database: Scopus**

Date of search: 19.11.19

Data parameters: none

Search Strategy: (((binge eating disorder) OR binge eating)) AND (((((((((((executive function) OR executive control) OR cognitive control) OR set shifting) OR cognitive flexibility) OR decision making) OR working memory) OR inhibitory control) OR problem solving) OR attention) OR planning)

### **Database: Web of Science**

Date of search: 19.11.19

Data parameters: none

Search Strategy: (((binge eating disorder) OR binge eating)) AND (((((((((((executive function) OR executive control) OR cognitive control) OR set shifting) OR cognitive flexibility) OR decision making) OR working memory) OR inhibitory control) OR problem solving) OR attention) OR planning)

### **Database: PubMed**

Date of search: 21.11.19

Data parameters: none

Search Strategy: (((binge eating disorder) OR binge eating)) AND (((((((((((executive control) OR cognitive control) OR executive function) OR set shifting) OR decision making) OR working memory) OR inhibitory control) OR problem solving) OR attention) OR cognitive flexibility) OR planning)

### **Database: PsycINFO, PsycARTICLES, PsycBOOKS**

Date of search: 20/11/2019

Data parameters: From 01/01/2009 to 20/11/2019

Search Strategy: Abstract: binge eating disorder OR Abstract: binge eating AND Abstract: executive control OR Abstract: cognitive control OR Abstract: set shifting OR Abstract: decision making OR Abstract: working memory OR Abstract: inhibitory control OR Abstract: problem solving OR Abstract: attention OR Abstract: cognitive flexibility AND Abstract: Planning AND Year: 2009 To 2019

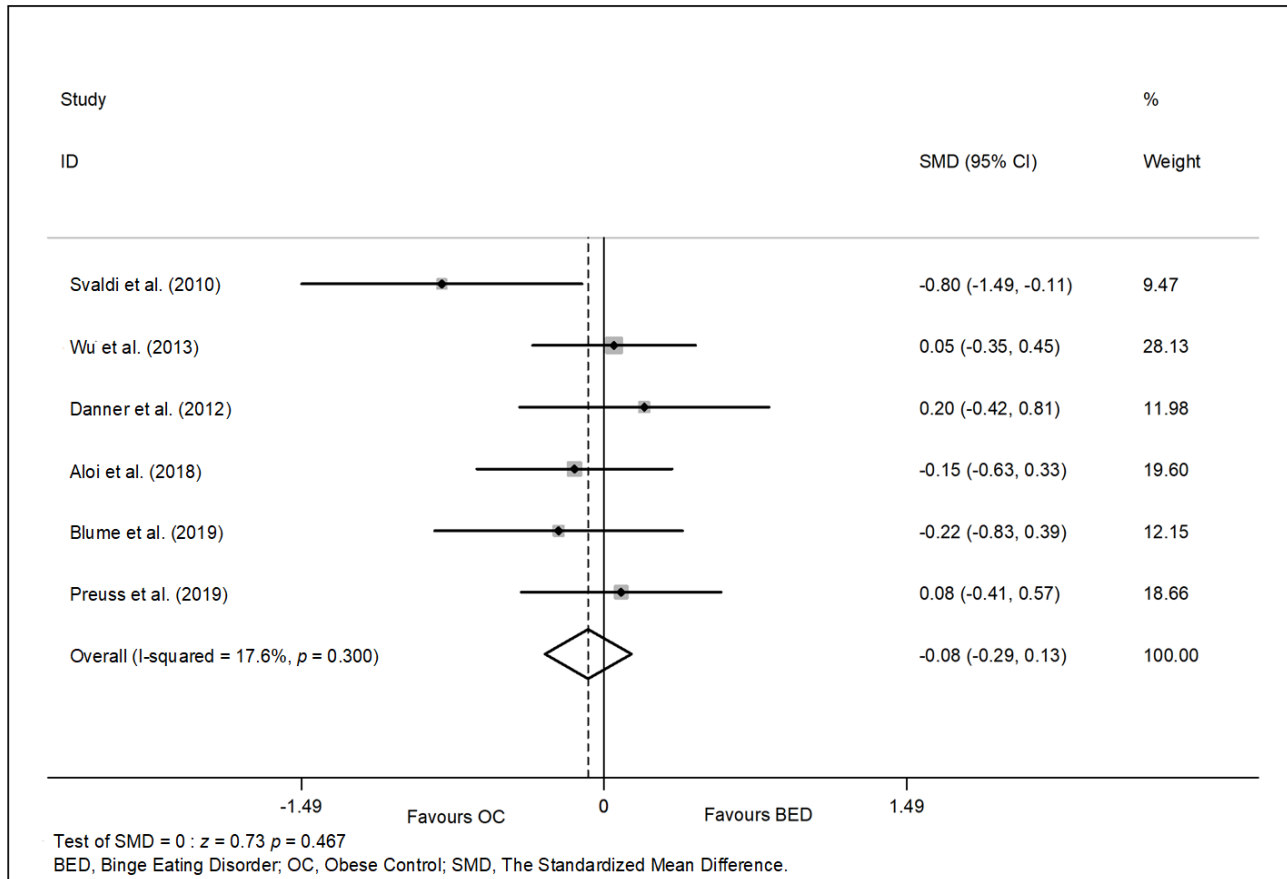

**Supplementary Figure 2.** Meta-analysis of studies examining decision-making function

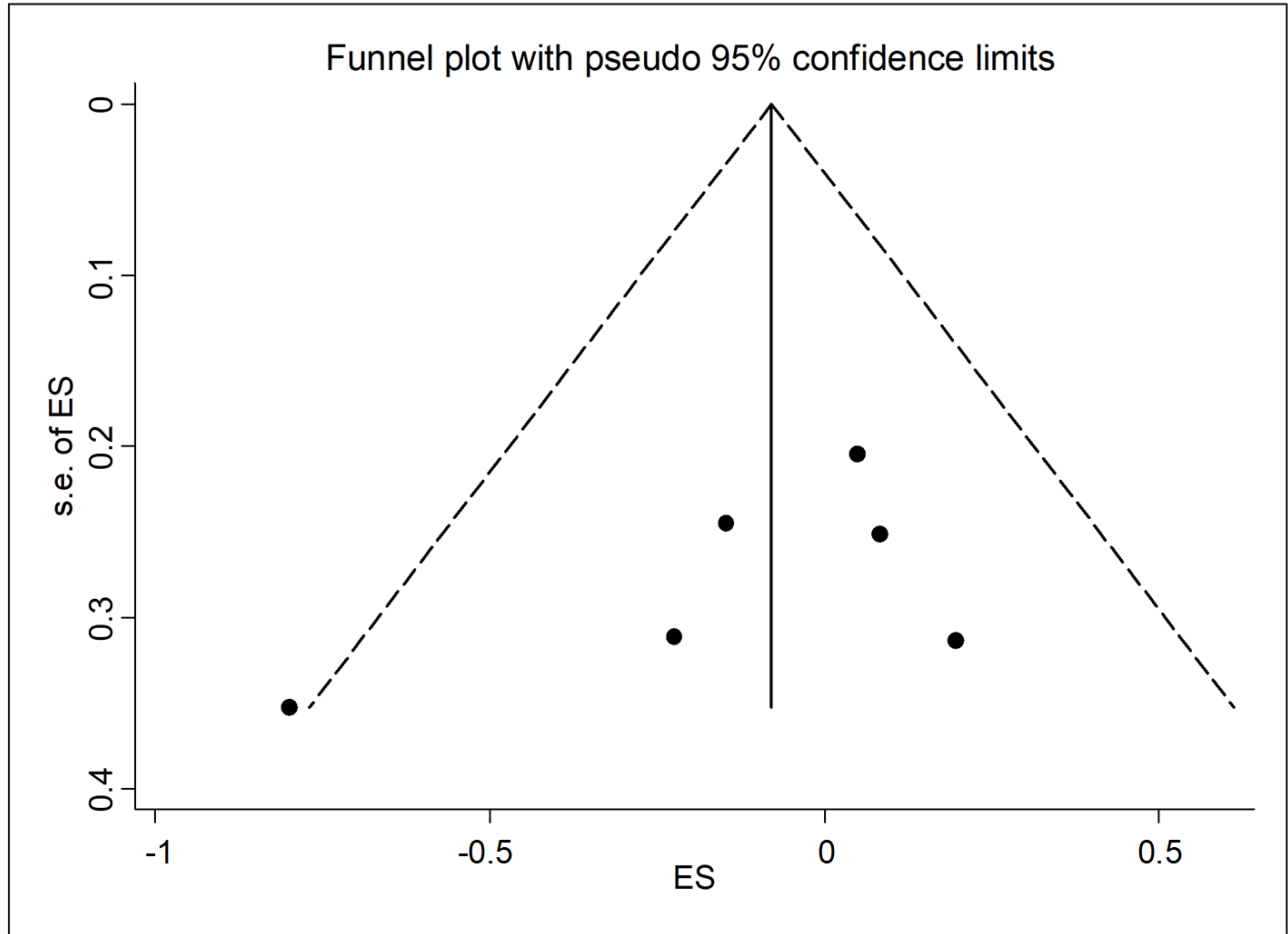

**Supplementary Figure 3.** Funnel plot of studies included in the decision-making meta-analysis.

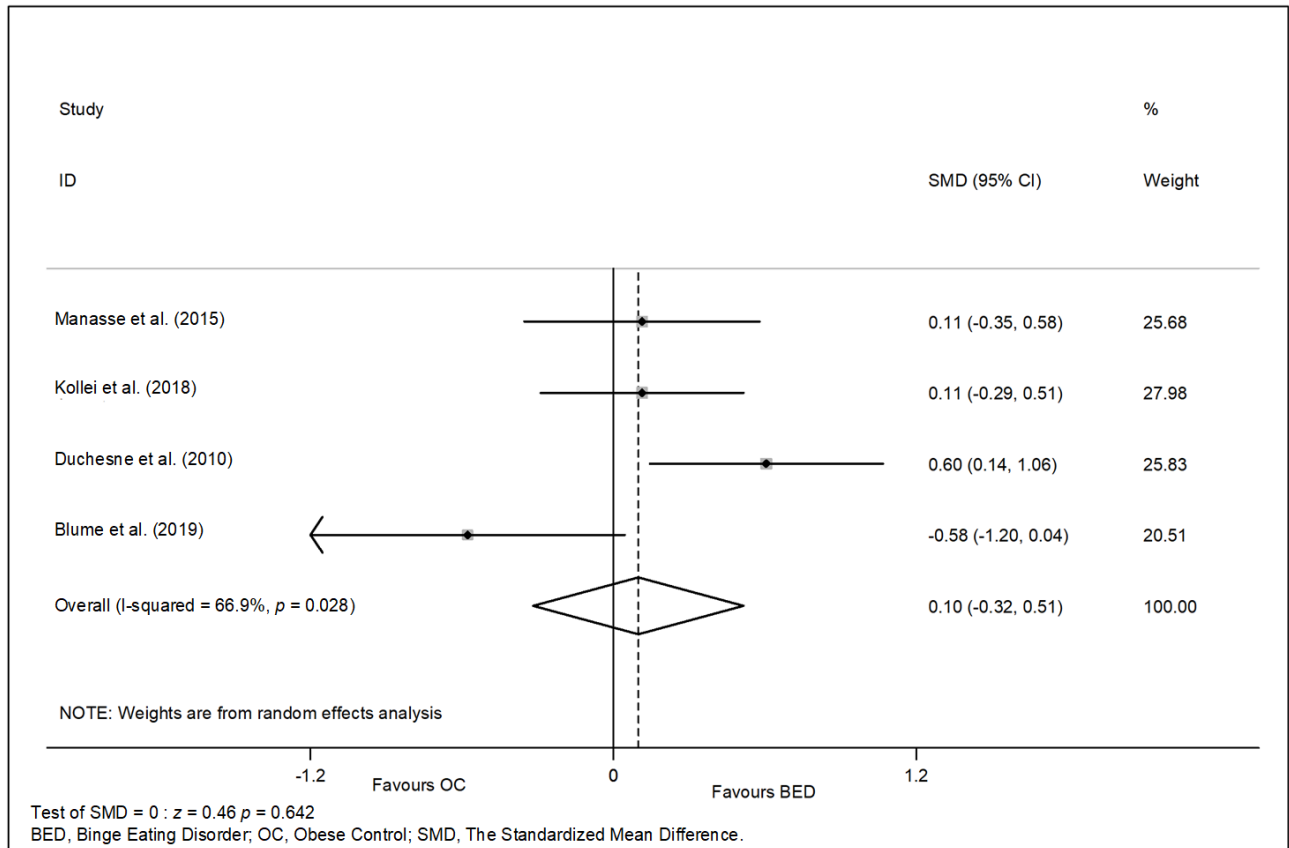

**Supplementary Figure 4.** Forest plot of standardized mean effect size of differences (SMD) in cognitive flexibility between individuals with binge eating disorder (BED) and obese healthy controls (OC). (Wisconsin Card Sorting Test (WCST), Penn Conditional Exclusion Task (PCET) and Intra-dimensional/Extra-dimensional Set-Shift task (IED)/perseverative errors)

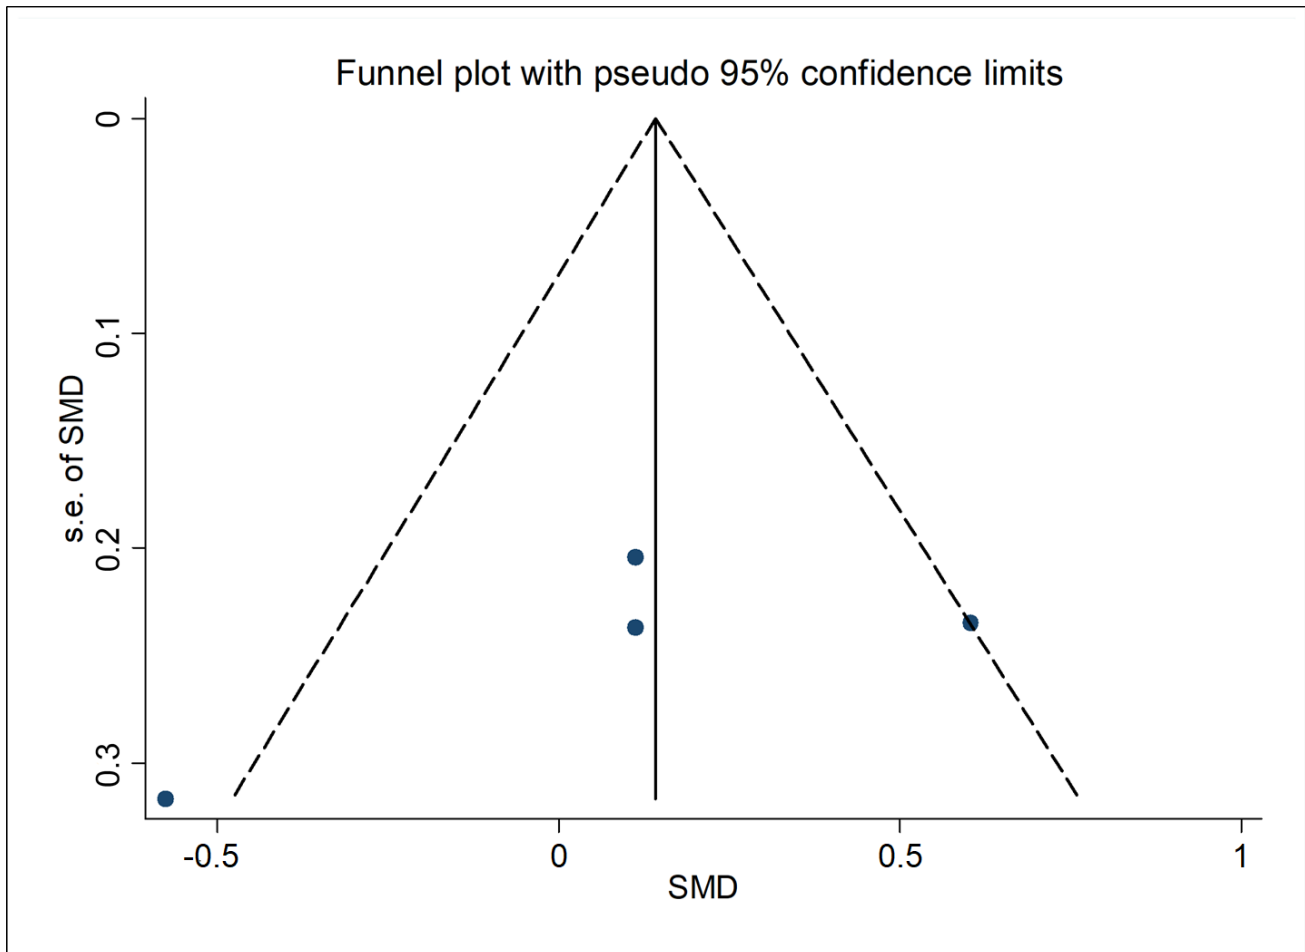

**Supplementary Figure 5.** Funnel plot of studies included in the cognitive flexibility meta-analysis (Wisconsin Card Sorting Test (WCST), Penn Conditional Exclusion Task (PCET) and Intra-dimensional/Extra-dimensional Set-Shift task (IED)/perseverative errors)

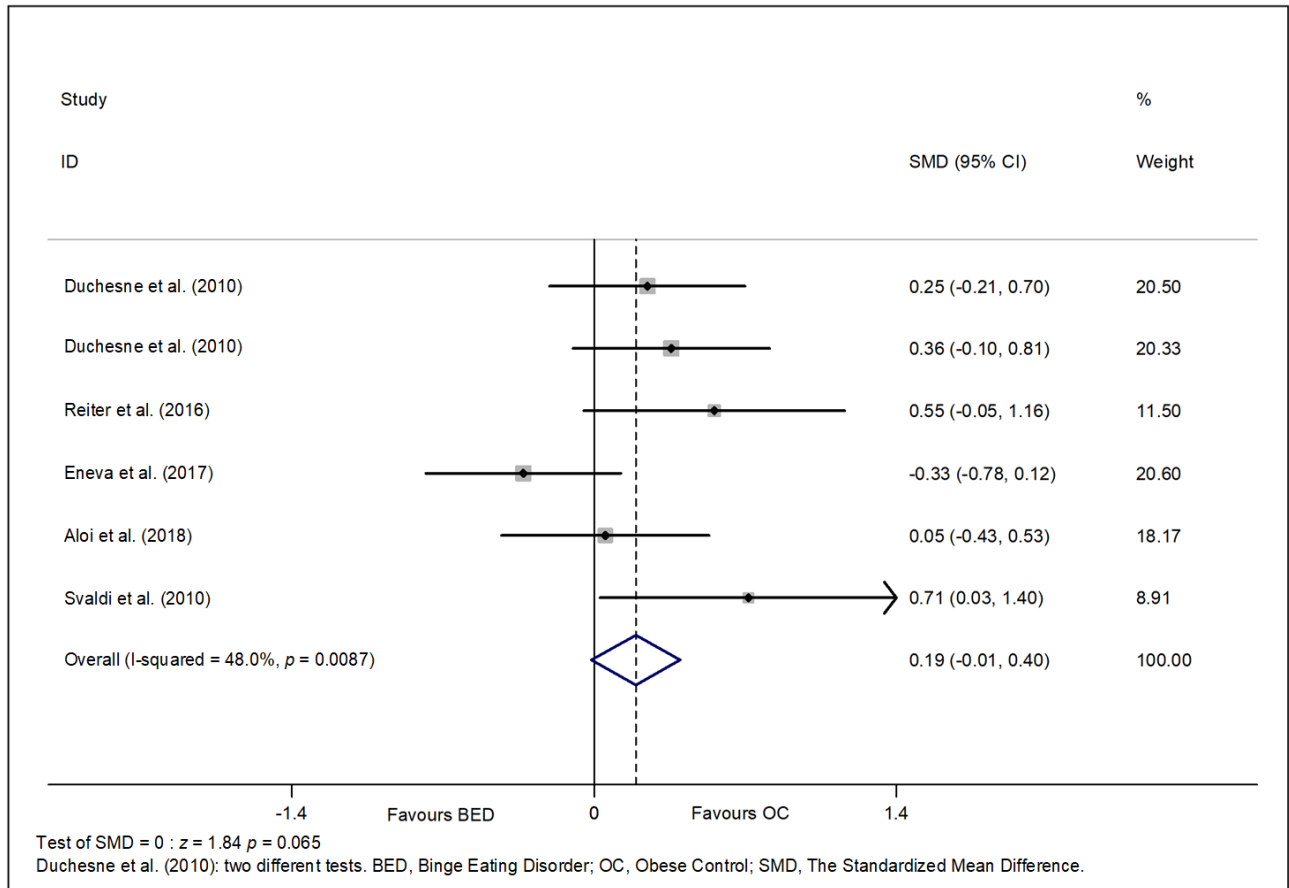

**Supplementary Figure 6.** Forest plot of standardized mean effect size of differences (SMD) in cognitive flexibility between individuals with binge eating disorder (BED) and obese healthy controls (OC). (Trail Making Test (TMT) and The Rule Shift Cards Test / time)

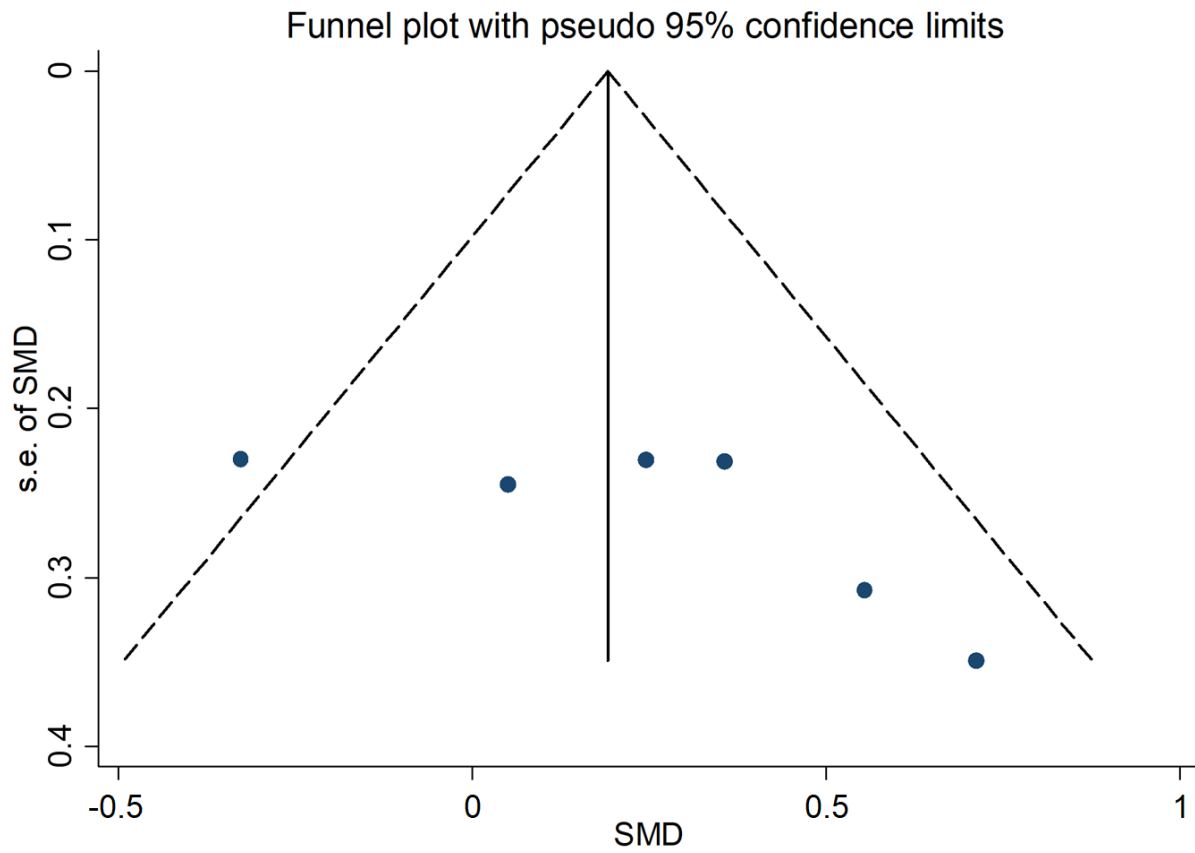

**Supplementary Figure 7.** Funnel plot of studies included in the cognitive flexibility meta-analysis (Trail Making Test (TMT) and The Rule Shift Cards Test / time)

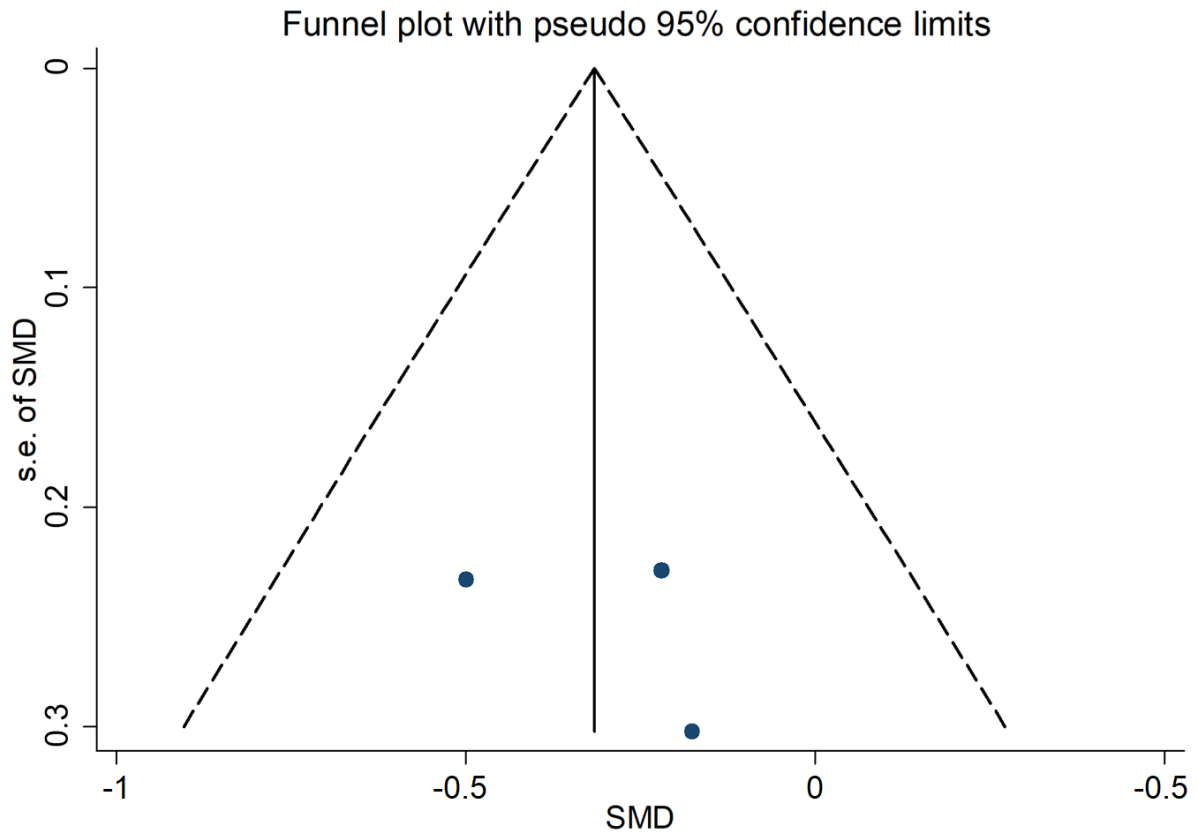

**Supplementary Figure 8.** Funnel plot of studies included in the working memory meta-analysis.



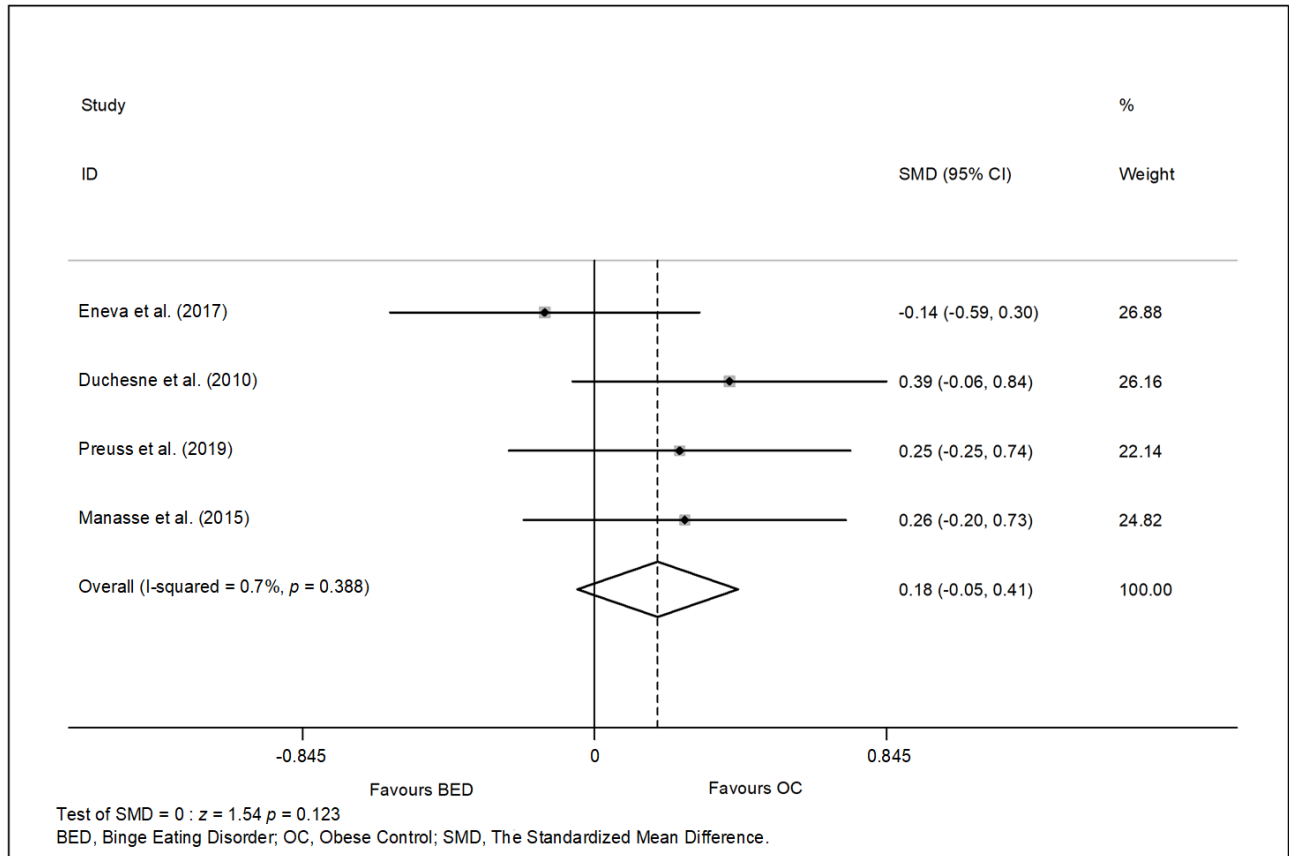

**Supplementary Figure 9.** Forest plot of standardized mean effect size of differences (SMD) in inhibitory control between individuals with binge eating disorder (BED) and obese healthy controls (OC) (Stroop test).

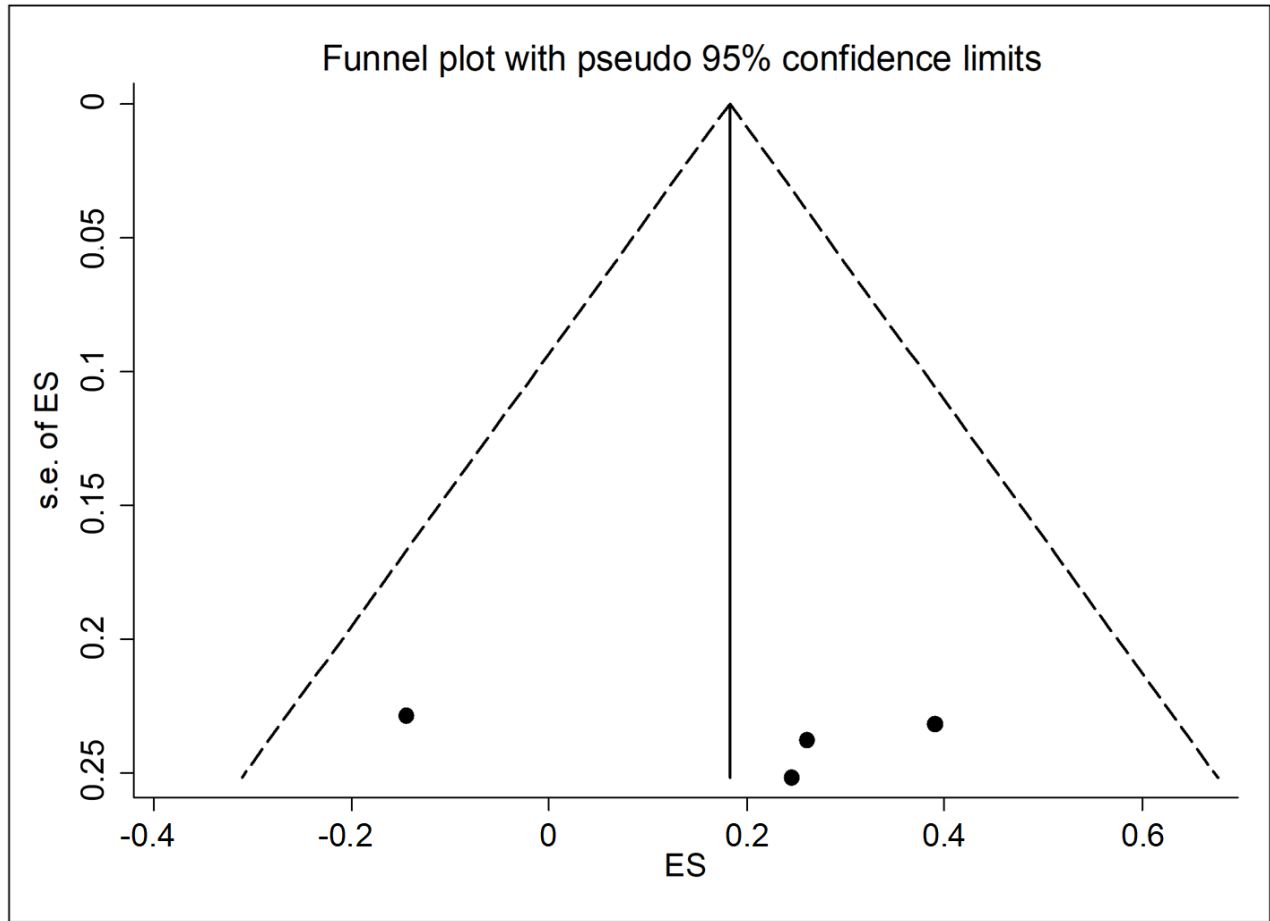

**Supplementary Figure 10.** Funnel plot of studies included in the inhibitory control meta-analysis (Stroop Test)

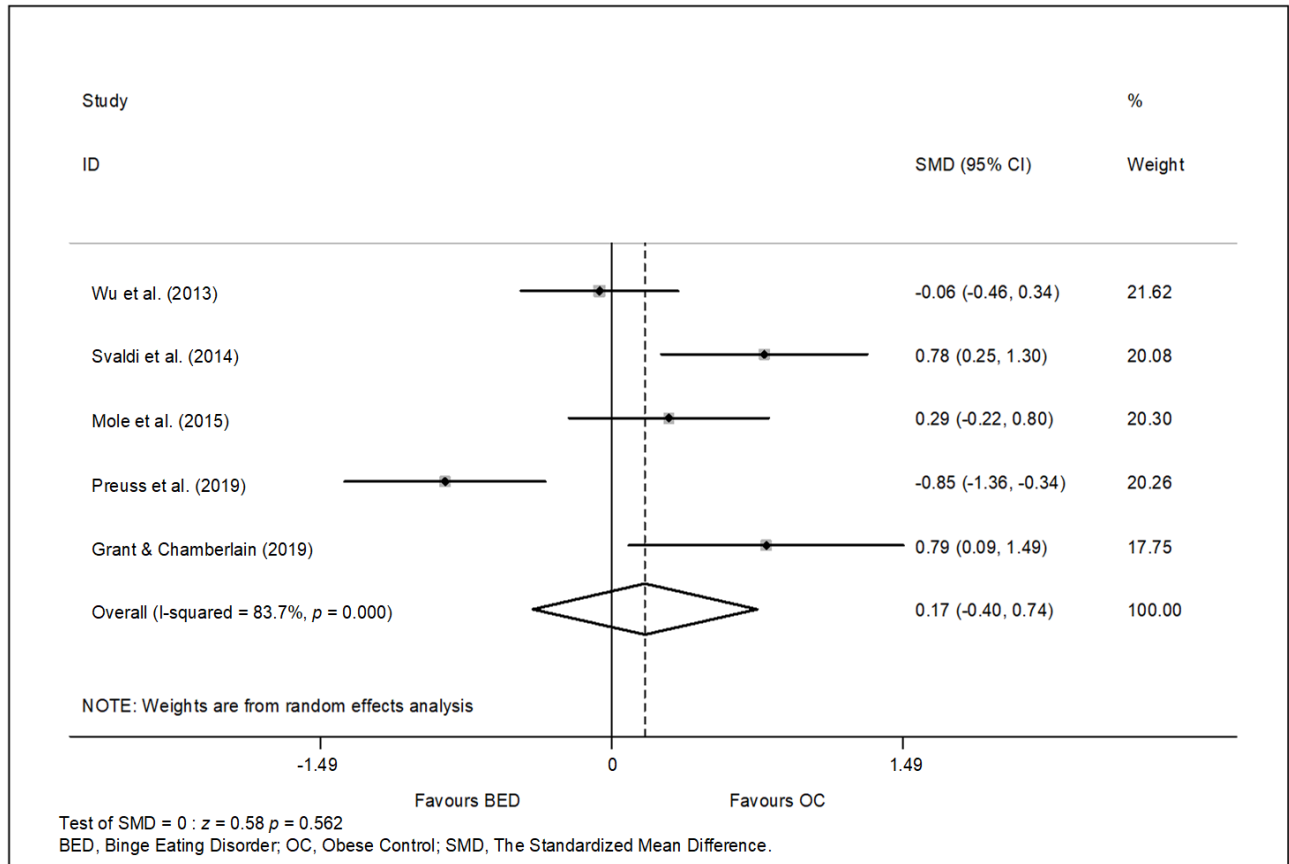

**Supplementary Figure 11.** Forest plot of standardized mean effect size of differences (SMD) in inhibitory control between individuals with binge eating disorder (BED) and obese healthy controls (OC). (Stop Signal Task)

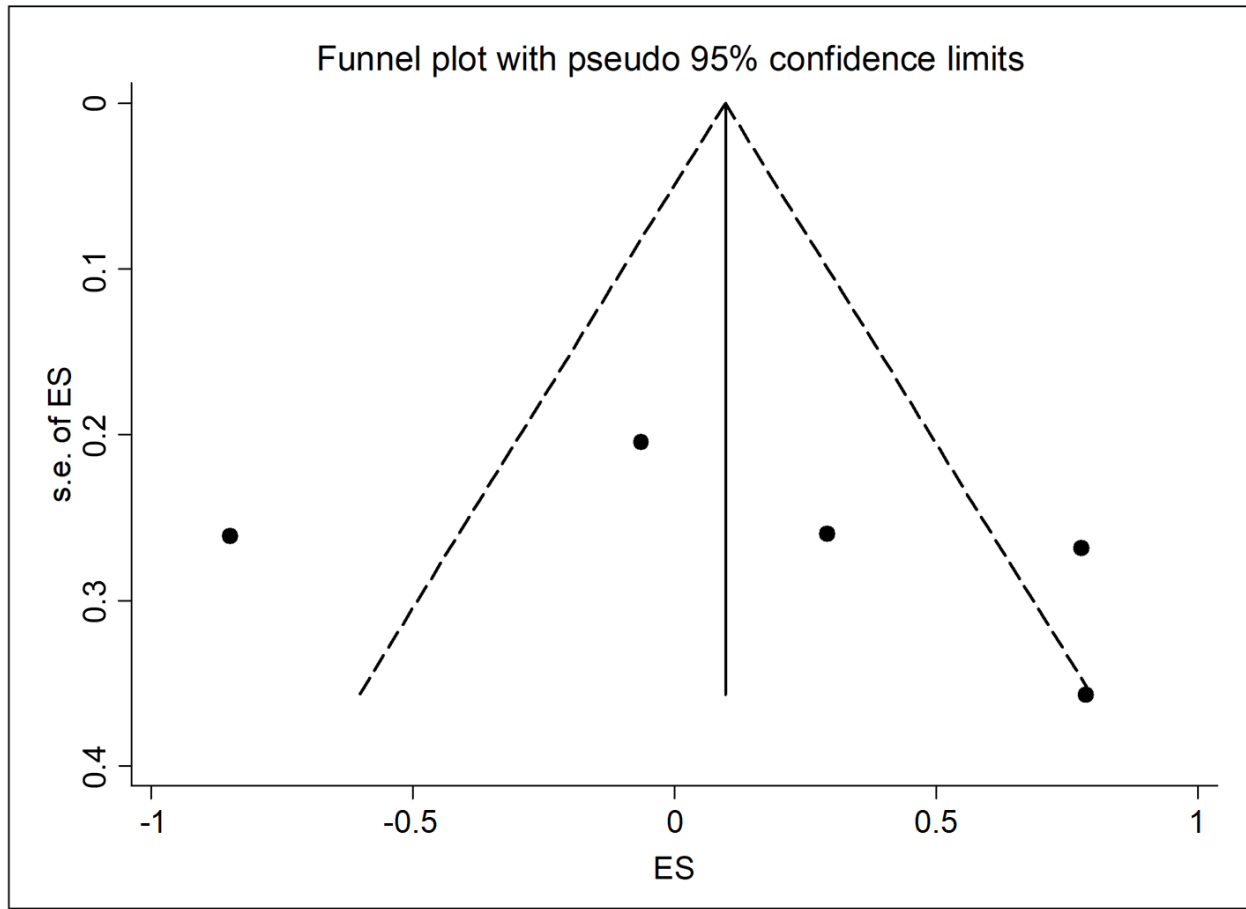

**Supplementary Figure 12.** Funnel plot of studies included in the inhibitory control meta-analysis (Stop Signal Task)



**Supplementary Table 1.** Characteristics of excluded studies

| Reasons for exclusion                                                                                                                                                                                                                                    | Studies                                                                                                                                                                                                                                                                      |
|----------------------------------------------------------------------------------------------------------------------------------------------------------------------------------------------------------------------------------------------------------|------------------------------------------------------------------------------------------------------------------------------------------------------------------------------------------------------------------------------------------------------------------------------|
| Did not include a group with a BED diagnosis                                                                                                                                                                                                             | Becker KR, Plessow F, Coniglio KA, Tabri N, Franko DL, Zayas, LV, et al. Global/local processing style: explaining the relationship between trait anxiety and binge eating. <i>Int J Eat Disord.</i> (2017) 50:1264-72. doi: 10.1002/eat.22772                               |
|                                                                                                                                                                                                                                                          | Kelly NR, Bulik C. M, Mazzeo SE. Executive functioning and behavioral impulsivity of young women who binge eat. <i>Int J Eat Disord.</i> (2013) 46:127-39. doi: 10.1002/eat.22096                                                                                            |
|                                                                                                                                                                                                                                                          | Smith KE, Mason TB, Crosby RD, Engel SG, Wonderlich SA. A multimodal, naturalistic investigation of relationships between behavioral impulsivity, affect, and binge eating. <i>Appetite.</i> (2019) 136:50-7. doi: 10.1016/j.appet.2019.01.014                               |
|                                                                                                                                                                                                                                                          | Segura-Serralta M, Perpiñá C, Ciscar S, Blasco L, Espert R, Romero-Escobar C, et al. Executive functions and emotion regulation in obesity and eating disorders. <i>Nutr Hosp.</i> (2019) 36:167-72. doi: 10.20960/nh.02016                                                  |
|                                                                                                                                                                                                                                                          | Billingsley-Marshall RL, Basso MR, Lund BC, Hernandez ER, Johnson CL, Drevets WC, et al. Executive function in eating disorders: The role of state anxiety. <i>Int J Eat Disord.</i> (2013) 46:316-21. doi: 10.1002/eat.22086                                                |
|                                                                                                                                                                                                                                                          | Harrison A, Tchanturia K, Naumann U, Treasure J. Social emotional functioning and cognitive styles in eating disorders. <i>Br J Clin Psychol.</i> (2012) 51:261-79. doi: 10.1111/j.2044-8260.2011.02026.x                                                                    |
|                                                                                                                                                                                                                                                          | Allen JL, Mason TB, Stout DM, Rokke PD. Emotion specific effects on attentional bias among women with shape and weight concerns. <i>Cognit Ther Res.</i> (2018) 42:612-21. doi: 10.1007/s10608-018-9916-7                                                                    |
| Did not evaluate an executive function examined in the review                                                                                                                                                                                            | Grant JE, Chamberlain SR. Impulsive action and impulsive choice across substance and behavioral addictions: Cause or consequence? <i>Addictive Behaviors.</i> (2014) 39:1632-9. doi: 10.1016/j.addbeh.2014.04.022                                                            |
|                                                                                                                                                                                                                                                          | Leehr EJ, Schag K, Dresler T, Grosse-Wentrup M, Hautzinger M, Fallgatter AJ, et al. Food specific inhibitory control under negative mood in binge-eating disorder: evidence from a multimethod approach. <i>Int J Eat Disord.</i> (2018) 51:112-23. doi: 10.1002/eat.22818   |
|                                                                                                                                                                                                                                                          | Leehr EJ, Schag K, Brückmann C, Plewnia C, Zipfel S, Nieratschker V, et al. A Putative association of COMT Val(108/158)Met with impulsivity in binge eating disorder. <i>Eur Eat Disord Rev.</i> (2016) 24:169-73. doi: 10.1002/erv.2421                                     |
|                                                                                                                                                                                                                                                          | Steward T, Mestre-Bach G, Vintró-Alcaraz C, Agüera Z, Jiménez-Murcia S, Granero R, et al. Delay discounting of reward and impulsivity in eating disorders: From anorexia nervosa to binge eating disorder. <i>Eur Eat Disord Rev.</i> (2017) 25:601-6. doi: 10.1002/erv.2543 |
| No neuropsychological assessment                                                                                                                                                                                                                         | Manwaring JL, Green L, Myerson J, Strube MJ, Wilfley DE. Discounting of various types of rewards by women with and without binge eating disorder: Evidence for general rather than specific differences. <i>Psychol Rec.</i> (2011) 61:561-82. doi: 10.1007/bf03395777       |
|                                                                                                                                                                                                                                                          | Bartholdy S, Rennalls S, Danby H, Jacques C, Campbell IC, Schmidt U, et al. Temporal discounting and the tendency to delay gratification across the eating disorder spectrum. <i>Eur Eat Disord Rev.</i> (2017) 25:344-50. doi: 10.1002/erv.2513                             |
| Danner UN, Evers C, Sternheim L, Van Meer F, Van Elburg AA, Geerets TAM, et al. Influence of negative affect on choice behavior in individuals with binge eating pathology. <i>Psychiatry Res.</i> (2013) 207:100-6. doi: 10.1016/j.psychres.2012.10.016 |                                                                                                                                                                                                                                                                              |

---

|                                                        |                                                                                                                                                                                                                                                                                                                        |
|--------------------------------------------------------|------------------------------------------------------------------------------------------------------------------------------------------------------------------------------------------------------------------------------------------------------------------------------------------------------------------------|
|                                                        | Annagur BB, Orhan O, Ozer A, Yalcin N, Tamam L. The effects of depression and impulsivity on obesity and binge eating disorder. <i>Bull Clin Psychopharmacol.</i> (2015) 25:162-70. doi: 10.5455/bcp.20130408021434                                                                                                    |
|                                                        | Boeka AG, Lokken KL. Prefrontal systems involvement in binge eating. <i>Eat Weight Disord.</i> (2011) 16:e121-6. doi: 10.1007/BF03325317                                                                                                                                                                               |
|                                                        | Giel KE, Speer E, Schag K, Leehr EJ, Zipfel S. Effects of a food-specific inhibition training in individuals with binge eating disorder—findings from a randomized controlled proof-of-concept study. <i>Eat Weight Disord.</i> (2017) 22:345-51. doi: 10.1007/s40519-017-0371-3                                       |
|                                                        | Turton R, Nazar BP, Burgess EE, Lawrence NS, Cardi V, Treasure J, et al. To go or not to go: A proof of concept study testing food-specific inhibition training for women with eating and weight disorders. <i>Eur Eat Disord Rev.</i> (2018) 26:11-21. doi: 10.1002/erv.2566                                          |
|                                                        | Alvarenga MS, Koritar P, Pisciolaro F, Mancini M, Cordás TA, Scagliusi FB. Eating attitudes of anorexia nervosa, bulimia nervosa, binge eating disorder and obesity without eating disorder female patients: Differences and similarities. <i>Physiol Behav.</i> (2014) 131:99-104. doi: 10.1016/j.physbeh.2014.04.032 |
|                                                        | Kessler RM, Hutson PH, Herman BK, Potenza MN. (2016). The neurobiological basis of binge-eating disorder. <i>Neurosci Biobehav Rev.</i> (2016) 63, 223–238. doi:10.1016/j.neubiorev.2016.01.013                                                                                                                        |
| Subjects had a history of BED and no current diagnosis | Lavender JM, Alosco ML, Spitznagel MB, Strain G, Devlin M, Cohen R, et al. Association between binge eating disorder and changes in cognitive functioning following bariatric surgery. <i>J Psychiatr Res.</i> (2014) 59:148-54. doi: 10.1016/j.jpsychires.2014.08.004                                                 |
|                                                        | Córdova ME, Schiavon CC, Busnello FM, Reppold CT. Nutritional and neuropsychological profile of the executive functions on binge eating disorder in obese adults. <i>Nutr Hosp.</i> (2017) 34:1448-54. doi: 10.20960/nh.1151                                                                                           |
| BED not assessed using a diagnostic tool               | Lyu Z, Zheng P, Lu S, Qin M. Impaired conflict monitoring to food cues in women who binge eat. <i>Front Psychol.</i> (2018) 9:2585. doi: 10.3389/fpsyg.2018.02585                                                                                                                                                      |
|                                                        | Manasse SM, Espel HM, Forman EM, Ruocco AC, Juarascio AS, Butryn M, et al. The independent and interacting effects of hedonic hunger and executive function on binge eating. <i>Appetite.</i> (2015) 89:16-21. doi: 10.1016/j.appet.2015.01.013                                                                        |
| Unable to access full text                             | Lee Y, Carmona NE, Shekotikhina M, Subramaniapillai M, Mansur RB, Cha DS, et al. Is binge eating a cognitive disorder? results from the international mood disorders collaborative project. <i>Ann Clin Psychiatry.</i> (2018) 30:25-31.                                                                               |
| Inclusion of adolescents                               | Halevy-Yosef R, Bachar E, Shalev L, Pollak Y, Enoch-Levy A, Gur E, et al. The complexity of the interaction between binge-eating and attention. <i>PLoS One.</i> (2019) 14:e0215506. doi: 10.1371/journal.pone.0215506                                                                                                 |
| No control group included                              | Chamberlain SR, Mogg K, Bradley BP, Koch A, Dodds CM, et al. Effects of mu opioid receptor antagonism on cognition in obese binge-eating individuals. <i>Psychopharmacology.</i> (2012) 224:501-9. doi: /10.1007/s00213-012-2778-x                                                                                     |

---

**Supplementary Table 2.** Studies included in each executive function subdomain and in meta-analyses

| <b>Tasks</b>                                 | <b>Study</b>            | <b>Included in meta-analysis</b> |
|----------------------------------------------|-------------------------|----------------------------------|
| <i>Executive function</i>                    |                         |                                  |
| Iowa Gambling Test                           | Davis et al. (2010)     | Yes                              |
|                                              | Danner et al. (2012)    | Yes                              |
|                                              | Aloi et al. (2018)      | Yes                              |
|                                              | Blume et al. (2018)     | Yes                              |
|                                              | Aloi et al. (2015)      | No                               |
|                                              | Dingemans et al. (2019) | No                               |
| Game of Dice Task                            | Svaldi et al. (2010)    | Yes                              |
|                                              | Wu et al. (2013)        | Yes                              |
| Door Opening Task                            | Preuss et al. (2019)    | Yes                              |
| Cambridge Gambling Task                      | Kollei et al. (2018)    | No                               |
|                                              | Grant et al. (2019)     | No                               |
| <i>Inhibitory Control</i>                    |                         |                                  |
| Stroop Test;<br>Color-Word Interference Test | Duchesne et al. (2010)  | Yes                              |
|                                              | Manasse et al. (2015)   | Yes                              |
|                                              | Eneva et al. (2017)     | Yes                              |
|                                              | Preuss et al. (2019)    | Yes                              |
|                                              | Dingemans et al. (2019) | No                               |
|                                              | Balodis et al. (2013)   | No                               |



---

|                               |                         |     |
|-------------------------------|-------------------------|-----|
| Stroop match-to-sample task   | Lee et al. (2017)       | No  |
| Verbal interference—word Task | Galioto et al. (2012)   | No  |
| Stop Signal Task              | Wu et al. (2013)        | Yes |
|                               | Svaldi et al. (2014)    | Yes |
|                               | Mole et al. (2015)      | Yes |
|                               | Grant et al. (2019)     | Yes |
|                               | Preuss et al. (2019)    | Yes |
|                               | Bartholdy et al. (2017) | No  |
| Hayling Task                  | Aloi et al. (2018)      | No  |
| Mental Flexibility Task       | Mobbs et al. (2011)     | No  |
| Pictorial priming paradigm    | Svaldi et al. (2015)    | No  |
|                               | Hege et al. (2014)      | No  |
| Go/No Go paradigm             | Loeber et al. (2018)    | No  |
|                               | Blume et al. (2018)     | No  |
|                               | Kollei et al. (2018)    | No  |
|                               |                         |     |
| <i>Working Memory</i>         |                         |     |
| Digit Span                    | Duchesne et al. (2010)  | Yes |
|                               | Reiter et al. (2016)    | Yes |
|                               | Galioto et al. (2012)   | No  |

---

---

|                                        |                         |     |
|----------------------------------------|-------------------------|-----|
|                                        | Dingemans et al. (2019) | No  |
| N-back Task with lures                 | Svaldi et al. (2014)    | No  |
| The Letter N-Back Task                 | Manasse et al. (2014)   | No  |
| NIH toolbox                            | Eneva et al. (2017)     | Yes |
| <i>Cognitive Flexibility</i>           |                         |     |
|                                        | Duchesne et al. (2010)  | Yes |
|                                        | Aloi et al. (2015)      | No  |
|                                        | Reiter et al. (2017)    | Yes |
| Trail Making Test                      | Eneva et al. (2017)     | Yes |
|                                        | Aloi et al. (2018)      | Yes |
|                                        | Dingemans et al. (2017) | No  |
|                                        | Svaldi et al. (2010)    | Yes |
|                                        | Duchesne et al. (2010)  | Yes |
|                                        | Duchesne et al. (2010)  | Yes |
| Rule Shift Cards Test                  | Blume et al. (2018)     | Yes |
|                                        | Dingemans et al. (2017) | No  |
|                                        | Aloi et al. (2015)      | No  |
|                                        | Kollei et al. (2018)    | Yes |
| Intra/extra dimensional set shift task | Banca et al. (2016)     | No  |
|                                        | Grant et al. (2019)     | No  |

---

---

|                                      |                        |     |
|--------------------------------------|------------------------|-----|
| Pen Conditional Exclusion Task       | Manasse et al. (2014)  | Yes |
| Modified affective shifting task     | Mobbs et al. (2011)    | No  |
| Switching of attention               | Galioto et al. (2012)  | No  |
| <i>Problem-Solving</i>               |                        |     |
| Tower Task                           | Manasse et al. (2015)  | No  |
| Means-Ends Problem-Solving Procedure | Svaldi et al. (2011)   | No  |
| Action Program Test                  | Duchesne et al. (2010) | No  |
| <i>Planning</i>                      |                        |     |
| Zoo Map Task                         | Duchesne et al. (2010) | No  |
| Tower Test                           | Eneva et al. (2017)    | No  |
| Maze Task                            | Galioto et al. (2012)  | No  |

---
